# Supplementary material for: Next-generation sequencing for sensitive detection of BCR-ABL1 mutations relevant to tyrosine kinase inhibitor choice in imatinib-resistant patients
Source: PubMed Central journal article supplement (PMC5008338; doi:10.18632/oncotarget.8010), 2016-03-09
Supplement: oncotarget-07-21982-s001.pdf [file oncotarget-07-21982-s001.pdf]

## Next-generation sequencing for sensitive detection of *BCR-ABL1* mutations relevant to tyrosine kinase inhibitor choice in imatinib-resistant patients

### Supplementary Materials

**Supplementary Table S1: Main features of group 1 patients**

|                                                                                       |            |
|---------------------------------------------------------------------------------------|------------|
| Pts, total                                                                            | 60         |
| Median age, years (range)                                                             | 54 (25–78) |
| Male to female ratio                                                                  | 35:25      |
| Disease phase/type:                                                                   |            |
| CML                                                                                   | 45         |
| chronic phase                                                                         | 32         |
| accelerated phase                                                                     | 3          |
| myeloid blast crisis                                                                  | 4          |
| lymphoid blast crisis                                                                 | 6          |
| Ph+ ALL                                                                               | 15         |
| Pts who failed 2 <sup>nd</sup> -line dasatinib                                        | 39         |
| Pts who failed 2 <sup>nd</sup> -line nilotinib                                        | 21         |
| Median time from diagnosis to 2 <sup>nd</sup> -line TKI therapy start, months (range) | 18 (3–72)  |
| Median time from 2 <sup>nd</sup> -line TKI therapy start to relapse, months (range)   | 6 (1–48)   |

Abbreviations: Pts, patients; CML, chronic myeloid leukemia; Ph+ ALL, Philadelphia chromosome-positive acute lymphoblastic leukemia.

**Supplementary Table S2: SS and NGS results at the time of switchover and at the time of subsequent resistance to second-line dasatinib or nilotinib**

| <i>N</i> | Disease Phase | Sex | Age | TKI | Mut by SS                  | Mut by NGS                                               | Response at the time of analysis           |
|----------|---------------|-----|-----|-----|----------------------------|----------------------------------------------------------|--------------------------------------------|
| 1        | CP-CML        | F   | 27  | IM  | No mutations               | No mutations                                             | No CHR after 3 months on IM                |
|          |               |     |     | DAS | T315I (~100%)              | T315I (94.8%)                                            | Progression to LBC after 2 months on DAS   |
| 2        | CP-CML        | M   | 69  | IM  | No mutations               | <b>F359V (16.5%)</b>                                     | Loss of MMR after 39 months on IM          |
|          |               |     |     | NIL | F359V (~60%)               | F359V (59.3%)                                            | Loss of complete CyR after 3 months on NIL |
| 3        | CP-CML        | M   | 62  | IM  | G250E (~100%)              | G250E (93.7%), <b>F317L (1.8%)</b>                       | Minor CyR after 12 months on IM            |
|          |               |     |     | DAS | G250E (~50%), F317L (~40%) | G250E (45.5%), F317L (37.5%), H295H (4.9%), C330C (1.5%) | No CyR after 13 months on DAS              |
| 4        | CP-CML        | F   | 60  | IM  | L384M (~100%)              | L384M (87.0%), <b>E255V (15.1%)</b>                      | Loss of complete CyR after 24 months on IM |
|          |               |     |     | NIL | E255V (~100%)              | E255V (80.7%), L384M (14.4%)                             | No CHR after 3 months on NIL               |
| 5        | CP-CML        | F   | 60  | IM  | No mutations               | No mutations                                             | Minor CyR after 12 months on IM            |
|          |               |     |     | DAS | F317L (~100%)              | F317L (100.0%)                                           | Loss of CHR after 12 months on DAS         |
| 6        | CP-CML        | M   | 49  | IM  | No mutations               | <b>E255K (18.4%)</b>                                     | Loss of complete CyR after 48 months on IM |
|          |               |     |     | NIL | E255K (~100%)              | E255K (79.9%)                                            | Minimal CyR after 6 months on NIL          |
| 7        | CP-CML        | F   | 57  | IM  | G250E (~100%)              | G250E (99.5%)                                            | Loss of complete CyR after 36 months on IM |
|          |               |     |     | DAS | F317L (~100%)              | F317L (99.5%)                                            | No CyR after 3 months on DAS               |
| 8        | CP-CML        | F   | 71  | IM  | H396R (~100%)              | H396R (99.6%), A413A (1.7%), K247N (1.1%)                | Partial CyR after 18 months on IM          |
|          |               |     |     | DAS | F317L (~20%)               | F317L (20.9%), H396R (3.5%)                              | Minimal CyR after 6 months on DAS          |
| 9        | CP-CML        | M   | 44  | IM  | No mutations               | A433A (1.5%), P408P (1.4%), K378R (1.3%)                 | No CyR after 12 months on IM               |

|    |        |   |    |     |                             |                                                                                                                                       |                                             |
|----|--------|---|----|-----|-----------------------------|---------------------------------------------------------------------------------------------------------------------------------------|---------------------------------------------|
|    |        |   |    | NIL | T315I (~70%)                | T315I (65.9%),<br>Y253H (16.7%),<br>W235R (3.8%),<br>F497L (3.1%),<br>T406I (2.4%),<br>Q477Q (2.4%),<br>F486S (2.3%),<br>D363N (1.5%) | No CyR after 13 months on NIL               |
| 10 | CP-CML | M | 66 | IM  | M351T (~100%)               | M351T (99.8%)                                                                                                                         | No CyR after 12 months on IM                |
|    |        |   |    | NIL | Y253H(~100%)                | Y253H (95.6%),<br>M351T (3.2%)                                                                                                        | No CyR after 22 months on NIL               |
| 11 | CP-CML | F | 60 | IM  | F359V (~80%)                | F359V (87.0%),<br>M244V (5.6%),<br>E450G (2.6%),<br>E236D (1.1%)                                                                      | Loss of MMR after 20 months on IM           |
|    |        |   |    | DAS | F317L (~100%)               | F317L (100%),<br>F486L (6.8%)                                                                                                         | Loss of MMR after 43 months on DAS          |
| 12 | CP-CML | F | 75 | IM  | No mutations                | M224V (3.2%),<br><b>T315I (3.1%)</b> ,<br>L364I (2.0%),<br>H396R (1.4%)                                                               | No complete CyR after 69 months on IM       |
|    |        |   |    | DAS | M244V (~100%), T315I (~20%) | M244V (100%), T315I (18.0%)                                                                                                           | No CyR after 25 months on DAS               |
| 13 | CP-CML | M | 53 | IM  | No mutations                | L387S (1.6%),<br>K378R (1.0%)                                                                                                         | Loss of complete CyR after 20 months on IM  |
|    |        |   |    | NIL | T315I (~20%)                | T315I (21.1%),<br>Y253H (3.6%)                                                                                                        | Loss of complete CyR after 27 months on NIL |
| 14 | CP-CML | F | 55 | IM  | No mutations                | G303E (1.2%),<br>V304I (1.1%)                                                                                                         | No complete CyR after 50 months on IM       |
|    |        |   |    | NIL | E255K (~100%)               | E255K (89.0%)                                                                                                                         | No CyR after 6 months on NIL                |
| 15 | CP-CML | M | 43 | IM  | No mutations                | <b>F317L (11.3%)</b>                                                                                                                  | Loss of MMR after 39 months on IM           |
|    |        |   |    | DAS | F317L (~50%)                | F317L (50.0%),<br>L451P (1.8%),<br>K294E (1.6%)                                                                                       | No CyR after 1 month on DAS                 |
| 16 | CP-CML | M | 34 | IM  | No mutations                | No mutations                                                                                                                          | Loss of complete CyR after 22 months on IM  |
|    |        |   |    | DAS | V299L (~100%)               | V299L (99.0%),<br>T394A (2.0%)                                                                                                        | Loss of MMR after 24 months on DAS          |
| 17 | CP-CML | M | 40 | IM  | No mutations                | E281K (1.3%)                                                                                                                          | No complete CyR after 18 months on IM       |
|    |        |   |    | DAS | T315I (~20%)                | T315I (22.0%)                                                                                                                         | Loss of complete CyR after 12 months on DAS |
| 18 | CP-CML | M | 64 | IM  | No mutations                | <b>Y253H (5.1%)</b>                                                                                                                   | No CyR after 6 months on IM                 |
|    |        |   |    | NIL | Y253H (~100%)               | Y253H (99.5%)                                                                                                                         | No CyR after 6 months on NIL                |

|    |        |   |    |     |                                           |                                                      |                                                    |
|----|--------|---|----|-----|-------------------------------------------|------------------------------------------------------|----------------------------------------------------|
| 19 | CP-CML | M | 51 | IM  | No mutations                              | No mutations                                         | Loss of MMR after 48 months on IM                  |
|    |        |   |    | NIL | F359I (~100%)                             | F359I (99.2%)                                        | Loss of complete CyR after 18 months on NIL        |
| 20 | CP-CML | M | 44 | IM  | No mutations                              | <b>T315I (8.3%)</b>                                  | Loss of complete CyR after 18 months on IM         |
|    |        |   |    | NIL | T315I (~100%)                             | T315I (99.7%)                                        | Loss of hematologic response after 3 months on NIL |
| 21 | CP-CML | M | 31 | IM  | No mutations                              | No mutations                                         | Loss of MMR after 24 months on IM                  |
|    |        |   |    | NIL | E255V (~100%)                             | E255V (99.7%)                                        | Loss of complete CyR after 12 months on NIL        |
| 22 | CP-CML | F | 37 | IM  | E255K (~25%)                              | E255K (23.2%), <b>T315I (16.9%)</b>                  | Loss of CHR after 9 months on IM                   |
|    |        |   |    | DAS | E255K (~100%), T315I (~100%)              | E255K (99.6%), T315I (98.6%)                         | No CHR after 1 month on DAS                        |
| 23 | CP-CML | F | 70 | IM  | No mutations                              | <b>F317L (6.5%)</b>                                  | Loss of complete CyR after 24 months on IM         |
|    |        |   |    | DAS | F317L (~100%)                             | F317L (99.5%)                                        | Progression to AP after 6 months on DAS            |
| 24 | CP-CML | M | 50 | IM  | No mutations                              | No mutations                                         | Loss of complete CyR after 36 months on IM         |
|    |        |   |    | NIL | T315I (~100%), E255K (~50%), F359I (~30%) | T315I (92.0%), E255K (48.2%), F359I (32.5%)          | Progression to MBC after 24 months on NIL          |
| 25 | CP-CML | F | 49 | IM  | No mutations                              | No mutations                                         | No complete CyR after 18 months on IM              |
|    |        |   |    | NIL | F359V (~100%)                             | F359V (99.7%)                                        | Loss of CHR after 9 months                         |
| 26 | CP-CML | M | 41 | IM  | No mutations                              | No mutations                                         | No CyR after 3 months on IM                        |
|    |        |   |    | DAS | F317L (~100%)                             | F317L (ttc > tta) (80.7%), F317L (ttc > ctc) (9.73%) | Loss of CHR after 6 months on DAS                  |
| 27 | CP-CML | M | 65 | IM  | No mutations                              | <b>E255K (15.4%)</b>                                 | Loss of complete CyR after 72 months on IM         |
|    |        |   |    | NIL | E255K (~100%)                             | E255K (97.8%)                                        | Loss of CHR after 3 months on NIL                  |
| 28 | CP-CML | M | 57 | IM  | No mutations                              | <b>T315I (5.0%)</b>                                  | Loss of CHR after 24 months on IM                  |
|    |        |   |    | NIL | T315I (~100%)                             | T315I (100.0%)                                       | Progression to MBC after 3 months on NIL           |
| 29 | CP-CML | F | 67 | IM  | No mutations                              | H396P (14.1%), <b>F317L (ttc &gt; tta) (1.4%)</b>    | Loss of complete CyR after 24 months on IM         |

|    |         |   |    |     |                              |                                                                                                 |                                             |
|----|---------|---|----|-----|------------------------------|-------------------------------------------------------------------------------------------------|---------------------------------------------|
|    |         |   |    | DAS | F317L (~100%)                | F317L (ttc > ctc) (55.2%), F317L (ttc > tta) (44.7%)                                            | Loss of CHR after 3 months on NIL           |
| 30 | CP-CML  | F | 59 | IM  | No mutations                 | <b>Y253H (4.4%)</b>                                                                             | Loss of MMR after 60 months on IM           |
|    |         |   |    | NIL | Y253H (~100%)                | Y253H (99.8%)                                                                                   | Loss of CCyR after 3 months on NIL          |
| 31 | CP-CML  | F | 62 | IM  | No mutations                 | No mutations                                                                                    | No complete CyR after 24 months on IM       |
|    |         |   |    | NIL | Y253H (~50%)                 | Y253H (45.5%)                                                                                   | Loss of complete CyR after 48 months on NIL |
| 32 | CP-CML  | F | 52 | IM  | No mutations                 | F311L (5.2%)                                                                                    | No MMR after 24 months on IM                |
|    |         |   |    | DAS | T315I (~70%)                 | T315I (66.5%)                                                                                   | Loss of complete CyR after 36 months on DAS |
| 33 | AP-CML  | M | 49 | IM  | E355G (~60%)                 | E355G (43.8%), L341P (19.8%), F496L (19.6%), L428L (11.0%), <b>T315I (10.2%)</b> , Y456Y (4.8%) | Progression to AP after 9 months on IM      |
|    |         |   |    | DAS | T315I (~50%)                 | T315I (42.6%), F317L (1.3%)                                                                     | Progression to MBC after 1 month on DAS     |
| 34 | AP-CML  | M | 44 | IM  | E279K (~50%)                 | E279K (55.4%)                                                                                   | Progression to AP after 6 months on IM      |
|    |         |   |    | NIL | E279K (~50%), T315I (~50%)   | E279K (48.8%), T315I (49.8%)                                                                    | Loss of CHR after 6 months on NIL           |
| 35 | AP-CML  | M | 39 | IM  | E255K (~100%)                | E255K (98.0%), <b>T315I (1.7%)</b>                                                              | Progression to AP after 18 months on IM     |
|    |         |   |    | NIL | E255K (~100%), T315I (~100%) | E255K (99.0%), T315I (99.0%)                                                                    | No HR after 1 month on NIL                  |
| 36 | MBC-CML | M | 32 | IM  | Y253H (~100%)                | Y253H (100.00%)                                                                                 | Progression to MBC after 22 months on IM    |
|    |         |   |    | DAS | F317L (~60%), T315I (~40%)   | F317L (55.3%), T315I (35.7%), T315A (7.0%), Y253H (4.1%)                                        | No CHR after 3 months on DAS                |
| 37 | MBC-CML | M | 48 | IM  | E255K (~100%)                | E255K (97.5%), <b>T315I (3.7%)</b>                                                              | No CHR after 2 months on IM                 |
|    |         |   |    | DAS | E255K (~100%), T315I (~100%) | E255K (97.7%), T315I (96.8%)                                                                    | No CHR after 1 month on DAS                 |

|    |         |   |    |     |                                                                       |                                                                           |                                                     |
|----|---------|---|----|-----|-----------------------------------------------------------------------|---------------------------------------------------------------------------|-----------------------------------------------------|
| 38 | MBC-CML | F | 59 | IM  | No mutations                                                          | Y253H (17.8%), F486S (11.6%), <b>F317L (9.6%)</b> , G250E (8.2%)          | Progression to MBC after 36 months on IM            |
|    |         |   |    | DAS | F317L (~100%)                                                         | F317L (60.9%)                                                             | No CHR after 1 month of DAS                         |
| 39 | MBC-CML | M | 43 | IM  | F317L (~100%)                                                         | F317L (99.9%), <b>Y253H (17.4%)</b>                                       | Progression to MBC after 44 months on IM            |
|    |         |   |    | NIL | F317L (~100%), Y253H (~100%)                                          | F317L (99.9%), Y253H (99.9%)                                              | No CHR after 2 months on NIL                        |
| 40 | LBC-CML | M | 56 | IM  | G250E (~40%), E255V (~20%)                                            | G250E (34.2%), E255V (21.1%), E255K (2.3%), Y253F (1.1%)                  | Progression to LBC after 32 months on IM            |
|    |         |   |    | DAS | T315I (~30%)                                                          | T315I (28.9%)                                                             | No CHR after 2 months on DAS                        |
| 41 | LBC-CML | F | 63 | IM  | Y253H (~100%)                                                         | Y253H (99.9%)                                                             | Progression to LBC after 48 months on IM            |
|    |         |   |    | DAS | Y253H (~50), F317L (~50)                                              | Y253H (54.9%), F317L (54.4%)                                              | Loss of CHR after 6 months on DAS                   |
| 42 | LBC-CML | F | 26 | IM  | E255K (~100%)                                                         | E255K (98.8%)                                                             | Progression to LBC after 9 months on IM             |
|    |         |   |    | DAS | E255K (~100%), T315I (~100%)                                          | E255K (99.8%), T315I (99.4%), L273S (1.4%)                                | No CHR after 1 month on DAS                         |
| 43 | LBC-CML | M | 78 | IM  | L387M (~30%)                                                          | L387M (34.1%)                                                             | Loss of CHR after 6 months on IM                    |
|    |         |   |    | DAS | L387M (~100%), T315I (~50%), M318V (~50%), F317L (~50%), Y320N (~50%) | L387M (96.3%), T315I (51.5%), M318V (51.2%), F317L (45.2%), Y320N (44.8%) | Loss of complete CyR and CHR after 14 months on DAS |
| 44 | LBC-CML | M | 28 | IM  | F359V (~60%)                                                          | F359V (57.9%)                                                             | Progression to LBC after 3 months on IM             |
|    |         |   |    | DAS | F359V (~100%), F317I (~100%)                                          | F317I (92.4%), F359V (90.1%), F317L (4.3%)                                | Loss of CHR after 9 months on DAS                   |
| 45 | LBC-CML | M | 55 | IM  | F317L (~100%)                                                         | F317L (99.5%), <b>Y253H (1.11%)</b>                                       | Progression to LBC after 32 months on IM            |
|    |         |   |    | NIL | F317L (~100%), Y253H (~100%)                                          | Y253H (98.9%), F317L (98.1%)                                              | No CHR after 1 month on NIL                         |

|    |     |   |    |     |                              |                                                                                              |                                            |
|----|-----|---|----|-----|------------------------------|----------------------------------------------------------------------------------------------|--------------------------------------------|
| 46 | ALL | M | 26 | IM  | Y253H (~100%)                | Y253H (99.8%)                                                                                | Hematologic relapse after 6 months on IM   |
|    |     |   |    | DAS | Y253H (~100%), T315I (~50%)  | Y253H (99.7%), T315I (40.3%), N336S (5.4%), W405R (1.9%)                                     | Hematologic relapse after 9 months on DAS  |
| 47 | ALL | M | 64 | IM  | M351T (~100%)                | M351T (99.9%)                                                                                | Hematologic relapse after 12 months on IM  |
|    |     |   |    | DAS | M351T (~100%), F317L (~50%)  | M351T (99.8%), F317L (53.3%)                                                                 | Hematologic relapse after 12 months on DAS |
| 48 | ALL | M | 37 | IM  | No mutations                 | No mutations                                                                                 | Hematologic relapse after 15 months on IM  |
|    |     |   |    | DAS | F317L (~100%)                | F317L (100.0%)                                                                               | Hematologic relapse after 6 months on DAS  |
| 49 | ALL | M | 36 | IM  | F359V (~100%)                | F359V (99.8%), M237T (2.1%)                                                                  | Hematologic relapse after 26 months on IM  |
|    |     |   |    | DAS | F359V (~100%), T315I (~100%) | F359V (99.3%), T315I (98.8%), Y449Y (10.5%)                                                  | Progressive disease after 1 month on DAS   |
| 50 | ALL | F | 50 | IM  | Y253H (~30%)                 | Y253H (28.4%)                                                                                | Molecular relapse after 12 months on IM    |
|    |     |   |    | DAS | Y253H (~100%), T315I (~100%) | Y253H (87.7%), T315I (86.2%)                                                                 | Hematologic relapse after 2 months on DAS  |
| 51 | ALL | F | 33 | IM  | E255K (~60%)                 | E255K (54.8%), F359V (13.8%), <b>T315I (3.8%)</b>                                            | Hematologic relapse after 6 months on IM   |
|    |     |   |    | DAS | T315I (~100%)                | T315I (99.4%)                                                                                | Progressive disease after 5 months on DAS  |
| 52 | ALL | M | 25 | IM  | Y253H (~50%), E255K (~20%)   | Y253H (56.0%), E255K (19.9%), <b>T315I (8.3%)</b> , Q252H (6.3%), A269T (3.6%), Y253F (1.4%) | Hematologic relapse after 9 months on IM   |
|    |     |   |    | DAS | T315I (~100%)                | T315I (91.0%)                                                                                | Progressive disease after 3 months on DAS  |
| 53 | ALL | M | 74 | IM  | No mutations                 | Y253H (2.5%), <b>T315I (2.5%)</b>                                                            | Hematologic relapse after 6 months on IM   |

|    |     |   |    |     |                                                              |                                                                                                   |                                               |
|----|-----|---|----|-----|--------------------------------------------------------------|---------------------------------------------------------------------------------------------------|-----------------------------------------------|
|    |     |   |    | DAS | Y253H (~50%),<br>T315I (~50%),<br>F317L(ttc > tta)<br>(~20%) | Y253H<br>(49.0%),<br>T315I (49.0%),<br>F317L(ttc > tta)<br>(20.0%),<br>F317L(ttc > ctc)<br>(5.0%) | Progressive disease after 2 months on<br>DAS  |
| 54 | ALL | F | 78 | IM  | No mutations                                                 | No mutations                                                                                      | Hematologic relapse after 12 months on<br>IM  |
|    |     |   |    | DAS | T315I (~100%)                                                | T315I (99.5%)                                                                                     | Hematologic relapse after 7 months on<br>DAS  |
| 55 | ALL | F | 60 | IM  | No mutations                                                 | No mutations                                                                                      | Hematologic relapse after 5 months on<br>IM   |
|    |     |   |    | DAS | T315I (~100%)                                                | T315I (92.5%)                                                                                     | Hematologic relapse after 3 months on<br>DAS  |
| 56 | ALL | F | 64 | IM  | Y253H<br>(~100%)                                             | Y253H<br>(100.00%)                                                                                | Molecular relapse after 15 months on IM       |
|    |     |   |    | DAS | T315I (~100%)                                                | T315I<br>(100.00%),<br>V289A (3.0%)                                                               | Hematologic relapse after 12 months on<br>DAS |
| 57 | ALL | F | 68 | IM  | Y253H<br>(~100%)                                             | Y253H (98.1%)                                                                                     | Hematologic relapse after 6 months on<br>IM   |
|    |     |   |    | DAS | T315I (~100%),<br>Y253H (~60%)                               | T315I (99.6%),<br>Y253H (63.3%)                                                                   | Hematologic relapse after 3 months on<br>DAS  |
| 58 | ALL | M | 59 | IM  | No mutations                                                 | L387F (1.4%),<br><b>T315I (1.4%)</b>                                                              | Hematologic relapse after 9 months on<br>IM   |
|    |     |   |    | DAS | L387F<br>(~100.0%),<br>T315I<br>(~100.0%)                    | L387F<br>(100.0%),<br>T315I (91.2%)                                                               | Hematologic relapse after 2 months on<br>DAS  |
| 59 | ALL | M | 44 | IM  | No mutations                                                 | <b>T315I (2.4%)</b>                                                                               | Hematologic relapse after 15 months on<br>IM  |
|    |     |   |    | DAS | T315I (~80%)                                                 | T315I (70.7%)                                                                                     | Hematologic relapse after 3 months on<br>DAS  |
| 60 | ALL | F | 66 | IM  | E255V<br>(~100%)                                             | E255V (92.8%),<br><b>T315I (2.1%)</b>                                                             | Hematologic relapse after 18 months on<br>IM  |
|    |     |   |    | DAS | E255V (~50%),<br>T315I (~30%)                                | E255V (50.4%),<br>T315I (24.3%)                                                                   | Progressive disease after 1 month on<br>DAS   |

Mutation burden is indicated in brackets; estimation was based on relative mutated to wild-type peak height in the sequencing output chromatogram or on the ratio between the number of reads harbouring the substitution and the total reads covering the corresponding nucleotide position for SS and NGS, respectively. When the same F317L mutation was found to result from different nucleotide substitutions in distinct clones, codon change is specified in brackets. Mutations that triggered dasatinib or nilotinib failure and were already detectable by NGS at switchover are in bold. Abbreviations: CP, chronic phase; MBC, myeloid blast crisis; LBC, lymphoid blast crisis; CyR, cytogenetic response; MMR, major molecular response; CHR, complete hematologic response; IM, imatinib; DAS, dasatinib; NIL, nilotinib.



**Supplementary Table S3: NGS results in the 25 imatinib-resistant patients who had an optimal response to second-line dasatinib/nilotinib therapy, analyzed for comparison**

| <i>N</i> | Disease Phase | Sex | Age | Mutation status by SS | Mutation status by UDS      | Response at switchover                     | 2 <sup>nd</sup> -line TKI |
|----------|---------------|-----|-----|-----------------------|-----------------------------|--------------------------------------------|---------------------------|
| 1        | CP-CML        | M   | 39  | No mutations          | Y320H (1.5%), H295R (1.5%)  | Loss of complete CyR after 36 months on IM | NIL                       |
| 2        | CP-CML        | M   | 47  | No mutations          | No mutations                | Loss of MMR after 48 months on IM          | NIL                       |
| 3        | CP-CML        | F   | 72  | No mutations          | No mutations                | No complete CyR after 24 months on IM      | DAS                       |
| 4        | CP-CML        | M   | 66  | H396P (~70%)          | H396P (65.2%)               | Loss of complete CyR after 44 months on IM | NIL                       |
| 5        | CP-CML        | F   | 55  | No mutations          | L298R (1.4%)                | No MMR after 24 months on IM               | NIL                       |
| 6        | CP-CML        | F   | 51  | No mutations          | No mutations                | Loss of MMR after 38 months on IM          | DAS                       |
| 7        | CP-CML        | F   | 31  | No mutations          | S438F (2.8%)                | Loss of MMR after 48 months on IM          | DAS                       |
| 8        | CP-CML        | M   | 69  | No mutations          | No mutations                | No MMR after 18 months on IM               | DAS                       |
| 9        | CP-CML        | M   | 45  | No mutations          | No mutations                | No MMR after 24 months on IM               | NIL                       |
| 10       | CP-CML        | M   | 52  | No mutations          | Y253C (2.0%), I432V (2.0%)  | No complete CyR after 18 months on IM      | DAS                       |
| 11       | CP-CML        | F   | 73  | No mutations          | F317L (3.6%)                | Loss of complete CyR after 60 months on IM | NIL                       |
| 12       | CP-CML        | M   | 37  | Y253H (~100%)         | Y253H (98.5%)               | Loss of complete CyR after 37 months on IM | DAS                       |
| 13       | CP-CML        | F   | 44  | No mutations          | H396P (14.7%), F317L (1.4%) | Loss of complete CyR after 36 months on IM | NIL                       |
| 14       | CP-CML        | M   | 65  | No mutations          | No mutations                | No MMR after 26 months on IM               | NIL                       |
| 15       | CP-CML        | F   | 61  | No mutations          | No mutations                | No CyR after 6 months on IM                | NIL                       |
| 16       | CP-CML        | M   | 53  | No mutations          | No mutations                | Minor CyR after 12 months on IM            | NIL                       |
| 17       | CP-CML        | M   | 49  | No mutations          | F497L (18.1%)               | No complete CyR after 24 months on IM      | DAS                       |
| 18       | MBC-CML       | M   | 64  | L387M (~30%)          | L387M (32.2%)               | Progression to MBC after 89 months on IM   | DAS                       |
| 19       | MBC-CML       | F   | 70  | Y253H (~30%)          | Y253H (27.6%), P465L (1.6%) | Progression to MBC after 22 months on IM   | DAS                       |
| 20       | MBC-CML       | M   | 52  | No mutations          | No mutations                | Progression to MBC after 89 months on IM   | DAS                       |
| 21       | LBC-CML       | M   | 53  | Y253F (~50%)          | Y253F (45.6%)               | Progression to LBC after 17 months on IM   | DAS                       |
| 22       | ALL           | F   | 71  | No mutations          | P439S (7.8%), A474A (6.2%)  | Molecular relapse after 14 months on IM    | DAS                       |

|    |     |   |    |               |                |                                                    |     |
|----|-----|---|----|---------------|----------------|----------------------------------------------------|-----|
| 23 | ALL | M | 69 | M351T (~100%) | M351T (100.0%) | Molecular relapse after 18 months on IM            | DAS |
| 24 | ALL | M | 66 | No mutations  | Y253H (2.1%)   | Molecular relapse after 21 months on IM            | DAS |
| 25 | ALL | M | 59 | M244V (~40%)  | M244V (37.1%)  | Loss of hematologic response after 12 months on IM | DAS |

Definition of optimal response as per 2013 ELN recommendations. The main features (phase/type of disease, male to female ratio, median age, type of resistance to first-line imatinib therapy, type of 2GTKI administered, median time from diagnosis) do not differ significantly from the 60 patients who were resistant to second-line dasatinib or nilotinib. Median follow-up on second-line therapy, 16 months (range, 9–36). Abbreviations: CP, chronic phase; MBC, myeloid blast crisis; LBC, lymphoid blast crisis; CyR, cytogenetic response; MMR, major molecular response; IM, imatinib; DAS, dasatinib; NIL, nilotinib.
